# Supplementary material for: Reconstructing the Biogeographic History of the Genus Aurelia Lamarck, 1816 (Cnidaria, Scyphozoa), and Reassessing the Nonindigenous Status of A. solida and A. coerulea in the Mediterranean Sea
Source: MDPI journal article supplement (doi:10.3390/d15121181), 2023-11-29
Supplement: s1 [file s1]

# Reconstructing the Biogeographic History of the Genus *Aurelia* Lamarck, 1816 (Cnidaria, Scyphozoa), and Reassessing the Nonindigenous Status of *A. solida* and *A. coerulea* in the Mediterranean Sea

Alfredo Fernández-Álías \*, Concepción Marcos and Angel Pérez-Ruzafa

Department of Ecology and Hydrology, and Regional Campus of International Excellence "Mare Nostrum", University of Murcia, 30100 Murcia, Spain; cmarcos@um.es (C.M.); angelpr@um.es (A.P.-R.)

\* Correspondence: alfredo.fernandez@um.es

**Supplementary materials:**

**Table S1.** Estimates of evolutionary divergence between sequences. The number of hundred base substitutions per site from between sequences are shown. 28S: above diagonal. COI: below diagonal.

| Ind  | I00 | I01   | I02   | I03   | I04   | I05   | I06   | I07   | I08   | I37   | I40   | I83   | I84   | I88   | I89   | I90   | I91   | I92   | I93   | I94   | I95   | I96   | I117  | I118  | I119  |
|------|-----|-------|-------|-------|-------|-------|-------|-------|-------|-------|-------|-------|-------|-------|-------|-------|-------|-------|-------|-------|-------|-------|-------|-------|-------|
| I00  |     | 0.128 | 0.000 | 0.000 | 0.128 | 0.128 | 0.000 | 0.000 | 0.000 | 0.128 | 0.000 | 0.000 | 0.000 | 0.000 | 0.000 | 0.000 | 0.128 | 0.128 | 0.128 | 0.000 | 0.000 | 0.000 | 0.000 | 0.000 | 0.000 |
| I01  | NA  |       | 0.128 | 0.128 | 0.255 | 0.000 | 0.128 | 0.128 | 0.128 | 0.000 | 0.128 | 0.128 | 0.128 | 0.128 | 0.128 | 0.128 | 0.255 | 0.000 | 0.000 | 0.128 | 0.128 | 0.128 | 0.128 | 0.128 | 0.128 |
| I02  | NA  | 1.333 |       | 0.000 | 0.128 | 0.128 | 0.000 | 0.000 | 0.000 | 0.128 | 0.000 | 0.000 | 0.000 | 0.000 | 0.000 | 0.000 | 0.128 | 0.128 | 0.128 | 0.000 | 0.000 | 0.000 | 0.000 | 0.000 | 0.000 |
| I03  | NA  | NA    | 0.188 |       | 0.128 | 0.128 | 0.000 | 0.000 | 0.000 | 0.128 | 0.000 | 0.000 | 0.000 | 0.000 | 0.000 | 0.000 | 0.128 | 0.128 | 0.128 | 0.000 | 0.000 | 0.000 | 0.000 | 0.000 | 0.000 |
| I04  | NA  | 1.141 | 1.721 | NA    |       | 0.255 | 0.128 | 0.128 | 0.128 | 0.255 | 0.128 | 0.128 | 0.128 | 0.128 | 0.128 | 0.128 | 0.255 | 0.255 | 0.255 | 0.128 | 0.128 | 0.128 | 0.128 | 0.128 | 0.128 |
| I05  | NA  | 1.141 | 1.721 | NA    | 1.527 |       | 0.128 | 0.128 | 0.128 | 0.000 | 0.128 | 0.128 | 0.128 | 0.128 | 0.128 | 0.128 | 0.255 | 0.000 | 0.000 | 0.128 | 0.128 | 0.128 | 0.128 | 0.128 | 0.128 |
| I06  | NA  | 1.141 | 1.916 | NA    | 1.527 | 1.141 |       | 0.000 | 0.000 | 0.128 | 0.000 | 0.000 | 0.000 | 0.000 | 0.000 | 0.000 | 0.128 | 0.128 | 0.128 | 0.000 | 0.000 | 0.000 | 0.000 | 0.000 | 0.000 |
| I07  | NA  | 1.721 | NA    | NA    | 1.721 | 1.333 | 1.721 |       | 0.000 | 0.128 | 0.000 | 0.000 | 0.000 | 0.000 | 0.000 | 0.000 | 0.128 | 0.128 | 0.128 | 0.000 | 0.000 | 0.000 | 0.000 | 0.000 | 0.000 |
| I08  | NA  | NA    | 1.721 | NA    | NA    | NA    | NA    | NA    |       | 0.128 | 0.000 | 0.000 | 0.000 | 0.000 | 0.000 | 0.000 | 0.128 | 0.128 | 0.128 | 0.000 | 0.000 | 0.000 | 0.000 | 0.000 | 0.000 |
| I37  | NA  | 1.527 | 1.333 | NA    | 1.527 | 1.527 | 1.527 | 0.188 | NA    |       | 0.128 | 0.128 | 0.128 | 0.128 | 0.128 | 0.128 | 0.255 | 0.000 | 0.000 | 0.128 | 0.128 | 0.128 | 0.128 | 0.128 | 0.128 |
| I40  | NA  | 1.141 | 1.721 | NA    | 1.141 | 1.141 | 1.141 | 0.567 | NA    | 0.377 |       | 0.000 | 0.000 | 0.000 | 0.000 | 0.000 | 0.128 | 0.128 | 0.128 | 0.000 | 0.000 | 0.000 | 0.000 | 0.000 | 0.000 |
| I83  | NA  | 1.527 | 1.721 | NA    | 1.527 | 1.141 | 1.527 | 0.188 | NA    | 0.377 | 0.377 |       | 0.000 | 0.000 | 0.000 | 0.000 | 0.128 | 0.128 | 0.128 | 0.000 | 0.000 | 0.000 | 0.000 | 0.000 | 0.000 |
| I84  | NA  | 1.141 | 1.141 | NA    | 1.527 | 0.377 | 1.141 | 0.949 | NA    | 1.141 | 0.758 | 0.758 |       | 0.000 | 0.000 | 0.000 | 0.128 | 0.128 | 0.128 | 0.000 | 0.000 | 0.000 | 0.000 | 0.000 | 0.000 |
| I88  | NA  | 0.567 | 0.949 | NA    | 0.949 | 0.567 | 0.567 | 1.141 | NA    | 0.949 | 0.567 | 0.949 | 0.567 |       | 0.000 | 0.000 | 0.128 | 0.128 | 0.128 | 0.000 | 0.000 | 0.000 | 0.000 | 0.000 | 0.000 |
| I89  | NA  | 0.758 | 0.567 | NA    | 0.758 | 0.758 | 0.758 | 0.949 | NA    | 0.758 | 0.377 | 0.758 | 0.758 | 0.188 |       | 0.000 | 0.128 | 0.128 | 0.128 | 0.000 | 0.000 | 0.000 | 0.000 | 0.000 | 0.000 |
| I90  | NA  | 1.527 | 1.916 | NA    | 0.377 | 1.916 | 1.916 | 2.112 | NA    | 1.916 | 1.527 | 1.916 | 1.916 | 1.333 | 1.141 | 0.128 |       | 0.128 | 0.128 | 0.000 | 0.000 | 0.000 | 0.000 | 0.000 | 0.000 |
| I91  | NA  | 1.333 | 1.916 | NA    | 1.721 | 0.567 | 1.333 | 1.916 | NA    | 2.112 | 1.721 | 1.721 | 0.949 | 1.141 | 1.333 | 2.112 | 0.255 |       | 0.255 | 0.128 | 0.128 | 0.128 | 0.128 | 0.128 | 0.128 |
| I92  | NA  | 1.333 | 0.567 | NA    | 1.721 | 0.567 | 1.333 | 1.916 | NA    | 2.112 | 1.721 | 1.721 | 0.949 | 1.141 | 1.333 | 2.112 | 0.000 | 0.000 |       | 0.128 | 0.128 | 0.128 | 0.128 | 0.128 | 0.128 |
| I93  | NA  | 1.527 | 0.188 | NA    | 0.377 | 1.916 | 1.916 | 2.112 | NA    | 1.916 | 1.527 | 1.916 | 1.916 | 1.333 | 1.141 | 0.000 | 2.112 | 2.112 | 0.128 |       | 0.128 | 0.128 | 0.128 | 0.128 | 0.128 |
| I94  | NA  | 1.141 | 1.916 | NA    | 0.000 | 1.527 | 1.527 | 1.721 | NA    | 1.527 | 1.141 | 1.527 | 1.527 | 0.949 | 0.758 | 0.377 | 1.721 | 1.721 | 0.377 | 0.000 |       | 0.000 | 0.000 | 0.000 | 0.000 |
| I95  | NA  | 1.333 | 1.916 | NA    | 1.721 | 0.567 | 1.333 | 1.916 | NA    | 2.112 | 1.721 | 1.721 | 0.949 | 1.141 | 1.333 | 2.112 | 0.000 | 0.000 | 2.112 | 1.721 | 0.000 |       | 0.000 | 0.000 | 0.000 |
| I96  | NA  | 1.333 | NA    | NA    | 1.721 | 0.567 | 1.333 | 1.916 | NA    | 2.112 | 1.721 | 1.721 | 0.949 | 1.141 | 1.333 | 2.112 | 0.000 | 0.000 | 2.112 | 1.721 | 0.000 | 0.000 |       | 0.000 | 0.000 |
| I117 | NA  | NA    | 1.916 | NA    | 0.000 |       | 0.000 |
| I118 | NA  | 1.721 | 0.567 | NA    | 1.721 | 1.333 | 1.721 | 0.000 | NA    | 0.188 | 0.567 | 0.188 | 0.949 | 1.141 | 0.949 | 2.112 | 1.916 | 1.916 | 2.112 | 1.721 | 1.916 | 1.916 | NA    |       | 0.000 |
| I119 | NA  | 1.141 |       | NA    | 0.377 | 1.141 |       | 1.333 | NA    | 1.141 | 0.758 | 1.141 | 1.141 | 0.567 | 0.377 | 0.758 | 1.721 | 1.721 | 0.758 | 0.377 | 1.721 | 1.721 | NA    | 1.333 |       |

**Table S2.** Coordinates where the genetically identified individuals of the genus *Aurelia* have been collected.

| <b>Species</b>        | <b>Latitude</b> | <b>Longitude</b> |
|-----------------------|-----------------|------------------|
| <i>Aurelia aurita</i> | 53.5            | -4.6666          |
|                       | 58.323          | 19.969           |
|                       | 44.9402         | -67.0025         |
|                       | 50.8175         | -1.4453          |
|                       | 60.188          | 5.538            |
|                       | 62.9            | 6.833            |
|                       | 43.409464       | 34.294299        |
|                       | 60.263          | 5.226128         |
|                       | 51.7317         | 3.9729           |
|                       | 48.5677         | -53.9567         |
|                       | 40.992395       | 29.000979        |
|                       | 41              | 29               |
|                       | 42.3573         | -71.0441         |
|                       | 51.3958         | 3.5704           |
|                       | 51.6755         | 3.7553           |
|                       | 42.878993       | 51.022505        |
|                       | 41.3801         | -71.6458         |
|                       | 58.7            | -94.2            |
|                       | 52.9616         | 4.7804           |
|                       | 51.7434         | 3.8796           |
|                       | 53.4448         | 6.8246           |
|                       | 54.5582         | 11.1555          |
|                       | 54.5944         | 18.6463          |
|                       | 44.5719         | 38.0511          |
|                       | 41.657739       | -71.445434       |
|                       | 58.2499         | 11.4465          |
|                       | 58.2666         | 11.4333          |
|                       | 54.18           | 7.898            |
|                       | 51.7761         | 3.9464           |
|                       | 54.744          | 8.273            |
|                       | 50.8321         | -1.0829          |
|                       | 53.7975         | -4.4848          |
|                       | 51.5923         | 3.719            |
|                       | 57.649          | 11.752           |
|                       | 54.423          | 10.2113          |
|                       | 63.94505        | -52.932967       |
|                       | 55.085          | -59.171          |
|                       | -33.03465       | -71.617981       |
|                       | 53.0056         | 4.7964           |
|                       | 40.7283         | 161.9282         |
|                       | 56.415          | -5.479           |
|                       | 54.4712         | 2.644            |
|                       | 59.042          | -2.751           |

**Table S2. (continued).**

---

|                             |          |            |
|-----------------------------|----------|------------|
|                             | -48.3495 | -74.1949   |
|                             | 53.0718  | 3.2326     |
|                             | 56.347   | -2.784     |
|                             | 47.7477  | -64.7084   |
|                             | 41.8047  | 35.415     |
|                             | 50.873   | -1.381     |
|                             | 50.8429  | -1.329     |
|                             | 45.0714  | -67.0546   |
|                             | 45.1019  | -67.0528   |
|                             | 54.9075  | 8.4222     |
|                             | 53.3651  | 5.2216     |
|                             | 41.0055  | 39.7494    |
|                             | 54.5035  | 2.8293     |
|                             | 55.037   | 1.7027     |
|                             | 54.8108  | 1.6898     |
|                             | 54.7952  | 2.1482     |
|                             | 52.4713  | 3.7827     |
|                             | -54.8778 | -68.2381   |
|                             | 52.7662  | 4.2128     |
|                             | 53.2969  | 5.089      |
|                             | 65.863   | 39.741     |
| <i>Aurelia ayla</i>         | 12.2     | -68.308611 |
| <i>Aurelia cebimarensis</i> | -25.068  | -47.898    |
|                             | -10.9918 | -37.0445   |
| <i>Aurelia clausa</i>       | 7.338133 | 134.467431 |
|                             | 2.883    | 131.721    |
|                             | 0.499    | 130.571222 |
|                             | -5.4178  | 150.701357 |
|                             | 7.3      | 134.4666   |
| <i>Aurelia coerulea</i>     | -43.2    | 147        |
|                             | -36.0164 | 150.1175   |
|                             | -34.5166 | 150.8333   |
|                             | -34.0711 | 151.1247   |
|                             | -33.8698 | 151.1999   |
|                             | -33.8547 | 151.2032   |
|                             | -33.8464 | 151.249    |
|                             | -33.3109 | 151.491    |
|                             | -33.0975 | 151.5799   |
|                             | -32.0132 | 115.7301   |
|                             | -26.6839 | 153.1338   |
|                             | 24.47    | 118.223    |
|                             | 31.36    | 130.68     |
|                             | 32.7178  | -117.184   |
|                             | 33.221   | 132.5553   |

**Table S2. (continued).**

|                             |           |             |
|-----------------------------|-----------|-------------|
|                             | 33.602    | -117.926    |
|                             | 33.6118   | -117.922    |
|                             | 33.6241   | -117.893    |
|                             | 33.68     | 135.32      |
|                             | 33.7549   | -118.15     |
|                             | 33.9662   | 118.4514    |
|                             | 34.125    | 132.552     |
|                             | 34.2003   | 132.5387    |
|                             | 34.5323   | 18.0538     |
|                             | 34.722    | 127.661     |
|                             | 34.9925   | 128.6752    |
|                             | 35.11     | 142.92      |
|                             | 35.1225   | -139.816    |
|                             | 35.211    | 139.405     |
|                             | 35.2161   | 129.228     |
|                             | 35.409    | 119.562     |
|                             | 35.4905   | 135.3688    |
|                             | 35.542    | 135.194     |
|                             | 36.112    | 120.322     |
|                             | 36.1544   | 120.3305    |
|                             | 36.918    | 122.41      |
|                             | 36.923333 | 122.511667  |
|                             | 37.221    | 119.182     |
|                             | 37.466    | 126.578     |
|                             | 37.536    | 121.424     |
|                             | 38.766    | 121.5       |
|                             | 38.9333   | 139.8       |
|                             | 38.9382   | 121.748     |
|                             | 39.106    | 118.506     |
|                             | 40.757832 | 29.905311   |
|                             | 41.2699   | 13.0341     |
|                             | 41.8822   | 15.7399     |
|                             | 42.2466   | 3.1351      |
|                             | 42.49     | 144.17      |
|                             | 48.728    | -3.983      |
|                             | 54.126825 | 8.835968    |
| <i>Aurelia cf. coerulea</i> | 11.5129   | 79.778      |
| <i>Aurelia colpota</i>      | No data   | No data     |
| <i>Aurelia columbia</i>     | 51.401    | -130.248    |
|                             | 48.768736 | -123.451825 |
|                             | 48.369    | -123.718    |
|                             | 48.65     | -123.4833   |
|                             | 48.5453   | -123.012    |
|                             | 47.79865  | -122.8664   |
|                             | 48.544899 | -123.003267 |

**Table S2. (continued).**

|                           |           |             |
|---------------------------|-----------|-------------|
| <i>Aurelia dubia</i>      | 25.216    | 55.068      |
|                           | 21.36     | 48.09       |
| <i>Aurelia cf. dubia</i>  | 29.512    | 34.947      |
| <i>Aurelia hyalina</i>    | 58.8014   | -93.8195    |
|                           | 58.8377   | -4.2376     |
|                           | 63.933967 | -52.920533  |
|                           | 63.94505  | -52.932967  |
|                           | 72.315    | 175.984     |
|                           | 65.578    | 168.348333  |
|                           | 59.633    | -151.45     |
| <i>Aurelia insularia</i>  | -23.098   | -44.278     |
|                           | -23.805   | -45.391     |
|                           | -27.2787  | -48.3789    |
|                           | -27.2846  | -48.3756    |
|                           | -27.1686  | -48.401     |
|                           | 25.081139 | -80.450917  |
| <i>Aurelia labiata</i>    | 60.53622  | -145.825434 |
|                           | 44.6351   | -124.0682   |
|                           | 38.2344   | -122.9802   |
|                           | 47.5      | -125.07     |
|                           | 48.83076  | -125.138254 |
|                           | 48.424931 | -123.3857   |
|                           | 36.860135 | -121.935804 |
| <i>Aurelia limbata</i>    | 39.081961 | 141.824288  |
|                           | 43.259    | 141.204     |
|                           | 37.014    | 129.965     |
|                           | 59.527309 | -152.255    |
| <i>Aurelia malayensis</i> | 9.645533  | 118.785398  |
|                           | 26.39     | 127.9       |
|                           | 7.2572    | 134.3825    |
|                           | 7.149     | 134.353     |
|                           | 7.15      | 134.3833    |
|                           | 7.3166    | 134.5166    |
|                           | 21.2852   | -157.8411   |
|                           | 2.1       | 118.33      |
|                           | -0.454817 | 130.493     |
|                           | 2.150333  | 118.514167  |
| <i>Aurelia madivensis</i> | No data   | No data     |
| <i>Aurelia marginalis</i> | 18.362153 | -93.59701   |
|                           | 30.1577   | -88.1394    |
|                           | 24.7808   | -80.6866    |
|                           | 30        | -88         |
|                           | 29.464658 | -94.772327  |
| <i>Aurelia mianzani</i>   | -35.93555 | -56.985622  |
|                           | -40.142   | -59.069     |

**Table S2.** (continued).

|                                 |            |             |
|---------------------------------|------------|-------------|
|                                 | -23.827138 | -45.422071  |
| <i>Aurelia misteriosa</i>       | 37.694429  | -25.3251    |
| <i>Aurelia miyakei</i>          | 13.280556  | 100.913333  |
| <i>Aurelia montyi</i>           | 30.1577    | -88.1394    |
|                                 | 24.7808    | -80.6866    |
| <i>Aurelia mozambica</i>        | -13.710756 | 40.595888   |
| <i>Aurelia persea</i>           | 32.8777778 | 34.975      |
| <i>Aurelia pseudosolida</i>     | 45.08484   | 13.634036   |
| <i>Aurelia cf. pseudosolida</i> | 37.694429  | -25.4251    |
|                                 | 38.541653  | -28.759464  |
| <i>Aurelia rara</i>             | 30.1577    | -88.1394    |
| <i>Aurelia relict</i>           | 42.723     | 17.501      |
|                                 | 42.7713    | 17.3627     |
|                                 | 42.781231  | 17.347346   |
| <i>Aurelia smithsoniana</i>     | 9.22349    | -82.21989   |
| <i>Aurelia solida</i>           | 45.641     | 13.728      |
|                                 | 40.258     | 17.889      |
|                                 | 37.298     | 9.939       |
|                                 | 37.187     | 9.858       |
|                                 | 45.53      | 13.556      |
|                                 | 45.547     | 13.722      |
|                                 | 29.512     | 34.947      |
|                                 | 20.15      | 38.592      |
|                                 | 44         | 14          |
|                                 | 42.8327    | 17.6986     |
|                                 | 45.5143    | 13.5742     |
|                                 | 37.724501  | -0.788332   |
| <i>Aurelia vitiana</i>          | No data    | No data     |
| <i>Aurelia</i> sp. 3            | 7.3384     | 134.4648    |
|                                 | 7.25       | 134.45      |
|                                 | 7.1518     | 134.3565    |
|                                 | 7.305      | 134.477     |
| <i>Aurelia</i> sp. 7            | -41.283    | 174.783     |
|                                 | -43.2      | 147         |
|                                 | -41.1645   | 173.8637    |
|                                 | -46.9834   | 168.1202    |
| <i>Aurelia</i> sp. 12           | 24.173437  | -110.315781 |
| <i>Aurelia</i> sp. 13           | 10.95636   | -85.72839   |
|                                 | 12.052363  | -86.706099  |
|                                 | 13.13522   | -88.1968    |
| <i>Aurelia</i> sp. 14           | 8.985814   | -79.492375  |
| <i>Aurelia</i> sp. 17           | 8.862      | 98.259      |
| <i>Aurelia</i> sp. 18           | 28         | -89.068889  |

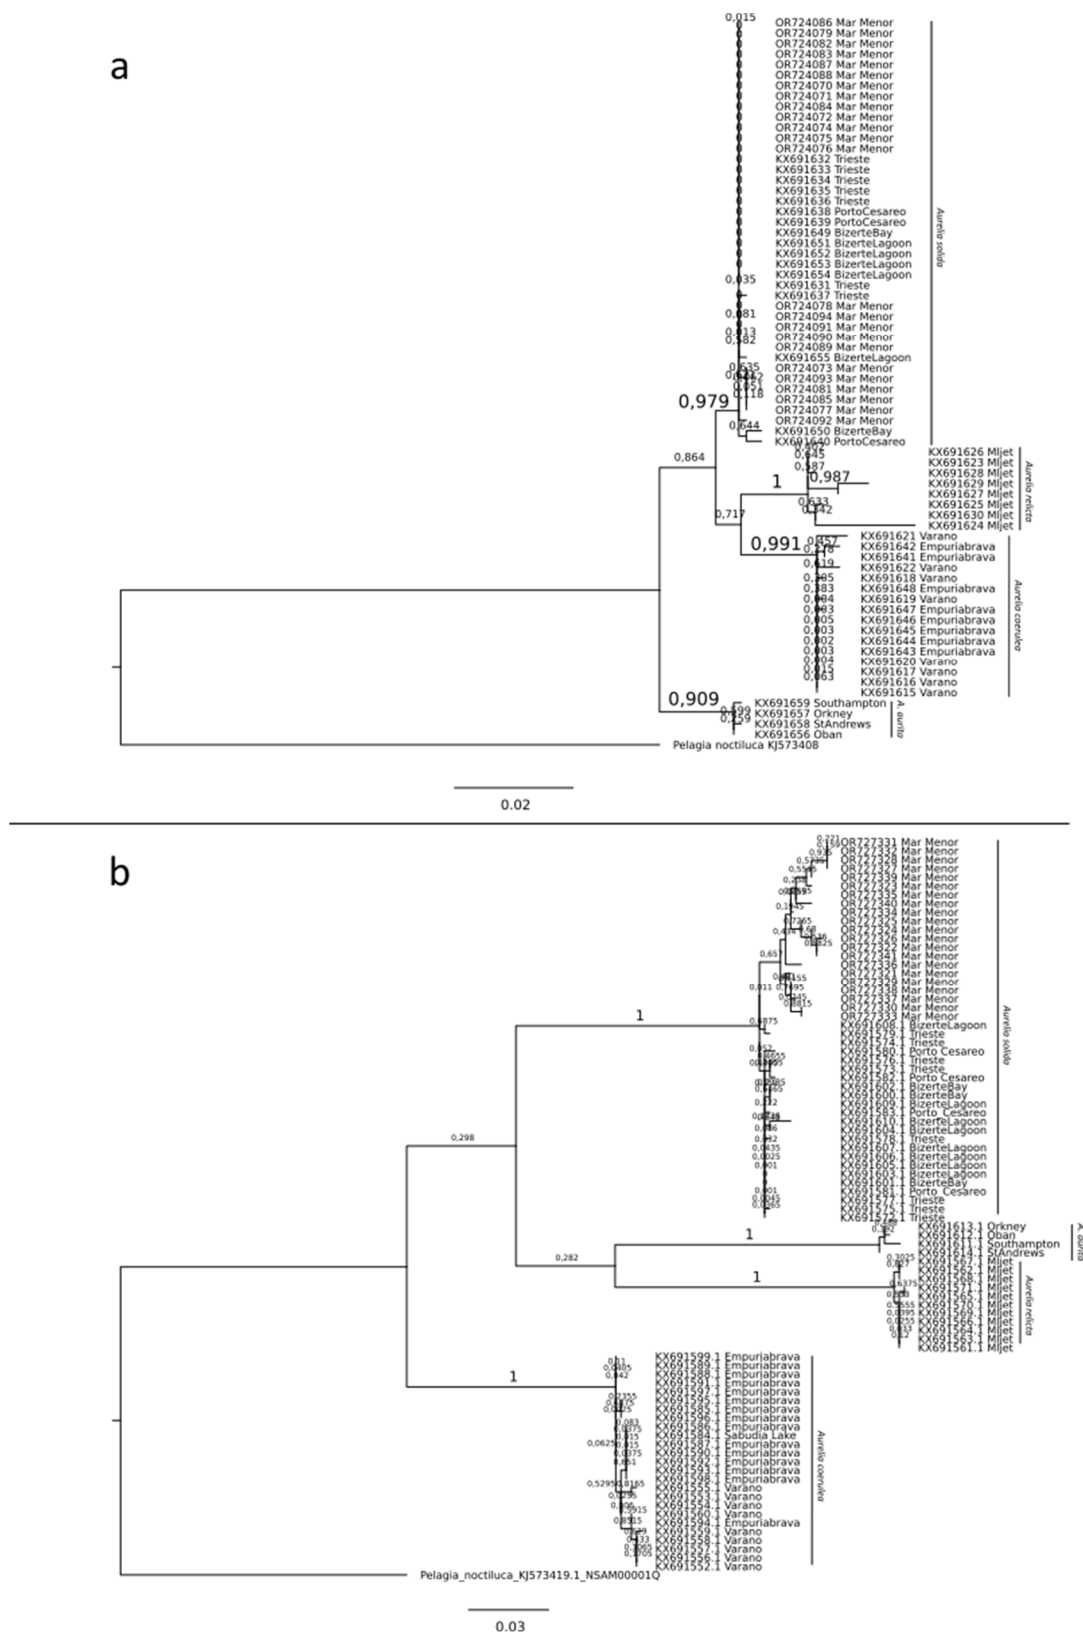

**Figure S1.** Evolutionary history, as inferred by Maximum Likelihood, of the genus *Aurelia* in the Mediterranean Sea. a) Phylogenetic tree for the 28S genetic marker. b) Phylogenetic tree for the COI genetic marker. Numbers above the tree branches indicate bootstrap support for each branch.
